# Supplementary material
Source: PubMed Central journal article supplement (PMC9465954)

## **SUPPLEMENTAL MATERIAL**

**Online Supplemental Table S1.** Baseline Characteristic of Included and Excluded Participants

**Online Supplemental Figure S1.** Frequency Distribution of Confirmed Hospitalizations (Left Panel) and Self-Reported Hospitalizations (Right Panel).

| <b>Table S1.</b>                          | <b>Included*<br/>n = 639</b> | <b>Excluded<br/>n = 601</b> | <b>P-Value</b> | <b>Std Diff (%)</b> |
|-------------------------------------------|------------------------------|-----------------------------|----------------|---------------------|
| <b>Age</b>                                | 60.2 ± 12.0                  | 58.8 ± 11.8                 | 0.034          | 12.1                |
| <b>Sex</b>                                |                              |                             |                |                     |
| <b>Male</b>                               | 395 (61.8%)                  | 383 (63.7%)                 | 0.486          | 4.0                 |
| <b>Female</b>                             | 244 (38.2%)                  | 218 (36.3%)                 |                |                     |
| <b>Race</b>                               |                              |                             |                |                     |
| <b>White/Caucasian</b>                    | 450 (70.4%)                  | 425 (70.8%)                 | 0.417          | 7.5                 |
| <b>Black/African-American</b>             | 145 (22.7%)                  | 144 (24.0%)                 |                |                     |
| <b>Other</b>                              | 44 (6.9%)                    | 31 (5.2%)                   |                |                     |
| <b>Missing</b>                            |                              | 1                           |                |                     |
| <b>Married</b>                            | 314 (49.2%)                  | 324 (53.9%)                 | 0.098          | 9.4                 |
| <b>Missing</b>                            | 1                            |                             |                |                     |
| <b>Live alone</b>                         | 168 (26.4%)                  | 152 (25.4%)                 | 0.676          | 2.4                 |
| <b>Missing</b>                            | 3                            | 2                           |                |                     |
| <b>High school education</b>              | 520 (81.9%)                  | 511 (85.2%)                 | 0.121          | 8.8                 |
| <b>Missing</b>                            | 4                            | 1                           |                |                     |
| <b>Insurance</b>                          | 491 (78.4%)                  | 464 (78.4%)                 | 0.981          | 0.1                 |
| <b>Missing</b>                            | 13                           | 9                           |                |                     |
| <b>ZIP median income (Median (IQR))</b>   | 45667.0 (35587.0, 61000.0)   | 45775.0 (36908.0, 59957.0)  | 0.652          | 2.6                 |
| <b>Missing</b>                            | 6                            | 6                           |                |                     |
| <b>Working status</b>                     |                              |                             |                |                     |
| <b>No, I don't currently work for pay</b> | 361 (56.9%)                  | 329 (54.9%)                 | 0.018          | 16.2                |
| <b>Yes, work full time</b>                | 203 (32.0%)                  | 226 (37.7%)                 |                |                     |
| <b>Yes, work part-time</b>                | 71 (11.2%)                   | 44 (7.3%)                   |                |                     |
| <b>Missing</b>                            | 4                            | 2                           |                |                     |
| <b>Difficulty getting care</b>            | 65 (10.3%)                   | 100 (16.8%)                 | < 0.001        | 19.3                |
| <b>Missing</b>                            | 5                            | 6                           |                |                     |
| <b>End-of-month financial status</b>      |                              |                             |                |                     |
| <b>Some money left over</b>               | 255 (40.3%)                  | 255 (43.5%)                 | 0.257          | 9.5                 |
| <b>Just enough to make ends meet</b>      | 228 (36.0%)                  | 214 (36.5%)                 |                |                     |
| <b>Not enough to make ends meet</b>       | 150 (23.7%)                  | 117 (20.0%)                 |                |                     |
| <b>Missing</b>                            | 6                            | 15                          |                |                     |
| <b>Prior cardiovascular disease</b>       | 270 (42.3%)                  | 237 (39.4%)                 | 0.312          | 5.7                 |
| <b>Heart failure</b>                      | 73 (11.4%)                   | 56 (9.3%)                   | 0.224          | 6.9                 |
| <b>Depression (PHQ≥10)</b>                | 150 (23.5%)                  | 142 (23.7%)                 | 0.947          | 0.4                 |
| <b>Missing</b>                            | 2                            | 2                           |                |                     |
| <b>Revascularization</b>                  |                              |                             |                |                     |
| <b>None</b>                               | 177 (27.7%)                  | 153 (25.5%)                 | 0.671          | 5.1                 |
| <b>PCI</b>                                | 405 (63.4%)                  | 393 (65.4%)                 |                |                     |
| <b>CABG</b>                               | 57 (8.9%)                    | 55 (9.2%)                   |                |                     |

| <b>Table S1.</b>                 | <b>Included*<br/>n = 639</b> | <b>Excluded<br/>n = 601</b> | <b>P-Value</b> | <b>Std Diff (%)</b> |
|----------------------------------|------------------------------|-----------------------------|----------------|---------------------|
| <b>Discharge disposition</b>     |                              |                             |                |                     |
| Home                             | 585 (91.5%)                  | 557 (92.7%)                 |                |                     |
| Nursing home/home health         | 35 (5.5%)                    | 28 (4.7%)                   |                |                     |
| Other                            | 19 (3.0%)                    | 16 (2.7%)                   | 0.756          | 4.2                 |
| <b>DC instructions: OP rehab</b> | 237 (37.1%)                  | 224 (37.3%)                 | 0.947          | 0.4                 |

**Continuous variables compared using Student's T-test.**

**Categorical variables compared using chi-square or Fisher's exact test.**

**\*This includes 31 participants who did not report an event but had at least one discovered through medical records retrieval from TRIUMPH enrollment sites.**

**Figure S1.**

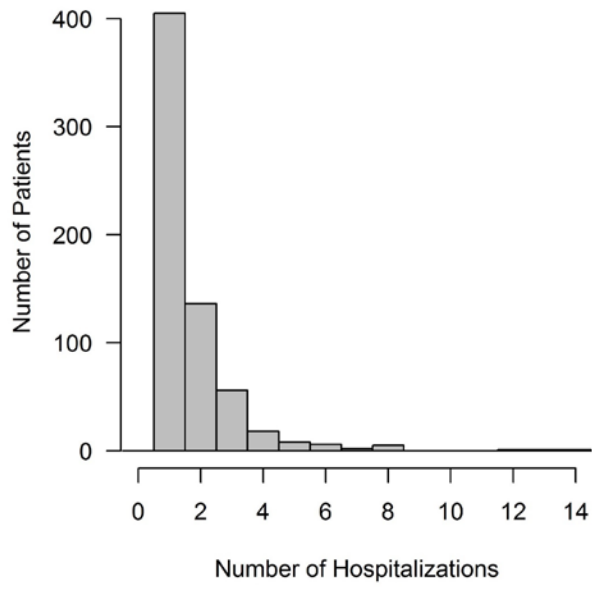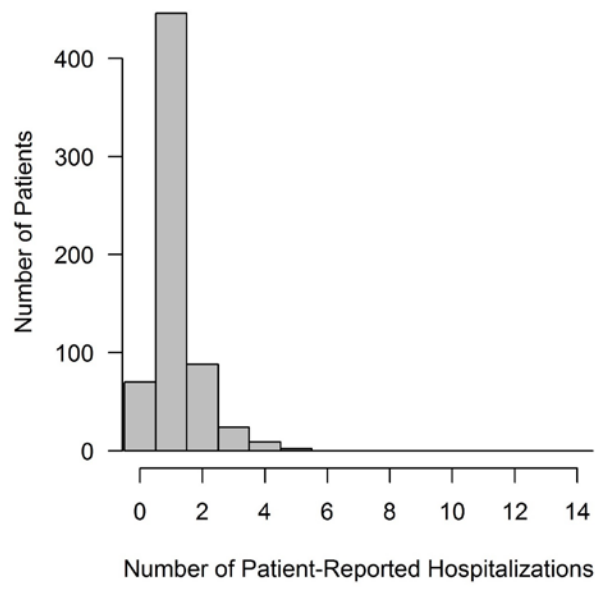

Supplement: NIHMS1589989-supplement-Supplemental_Material.pdf [file NIHMS1589989-supplement-Supplemental_Material.pdf]
